# Supplementary material
Source: PubMed Central journal article supplement (PMC5033864)

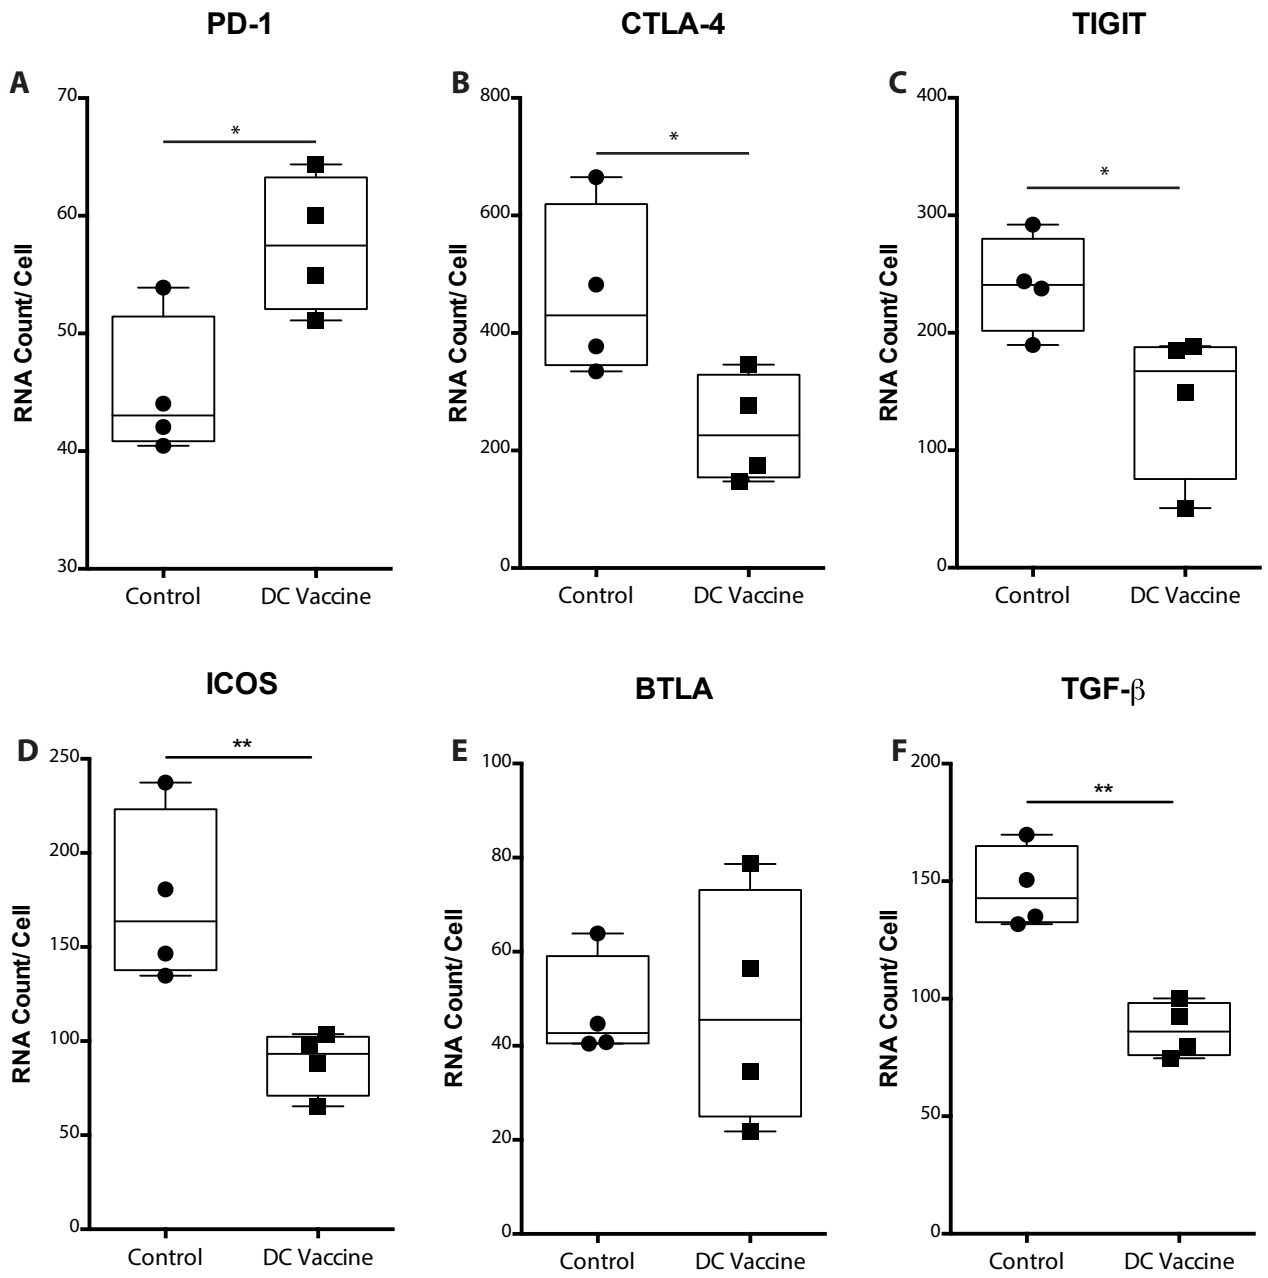

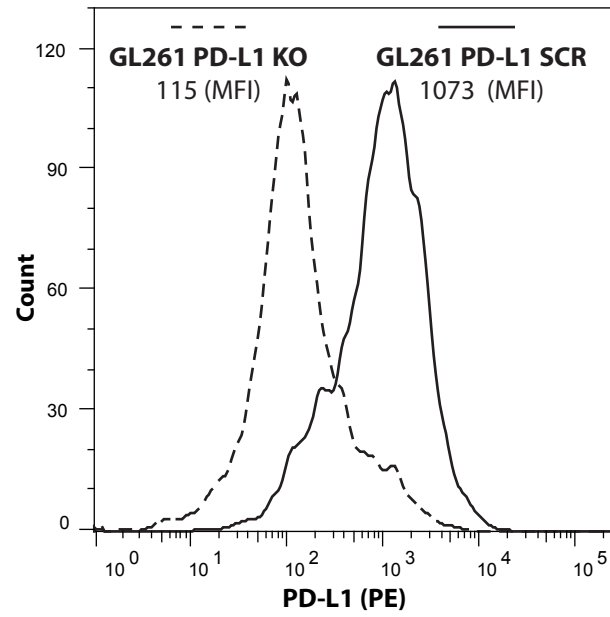

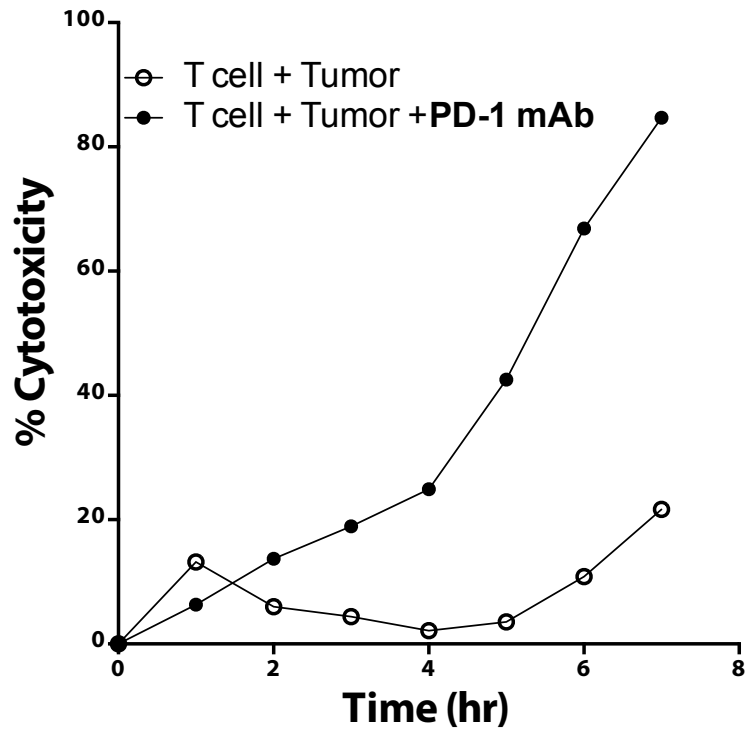

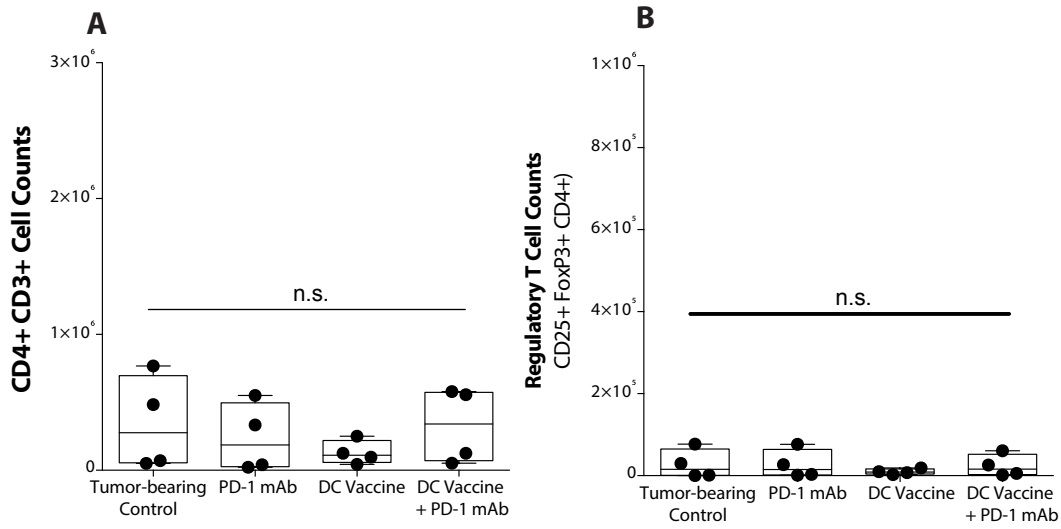

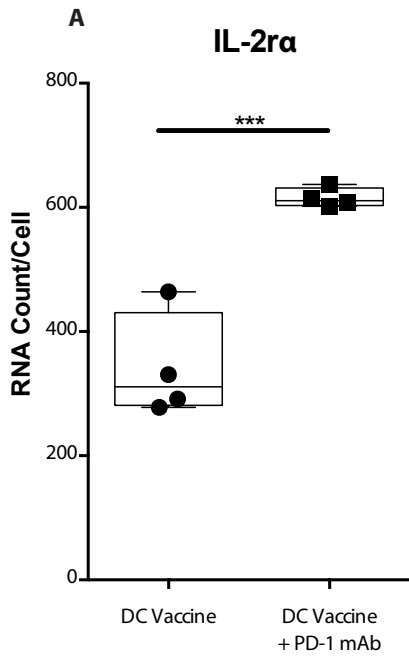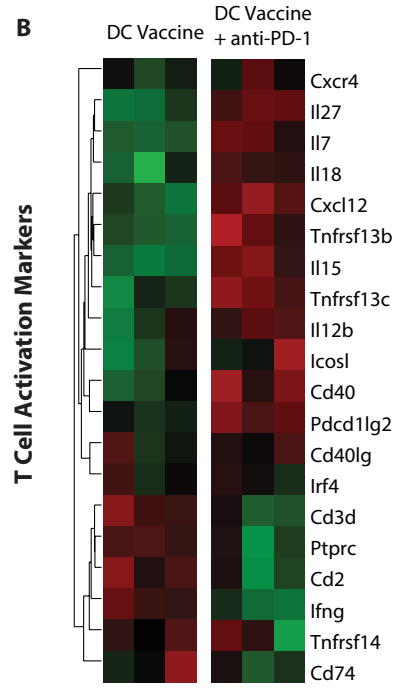

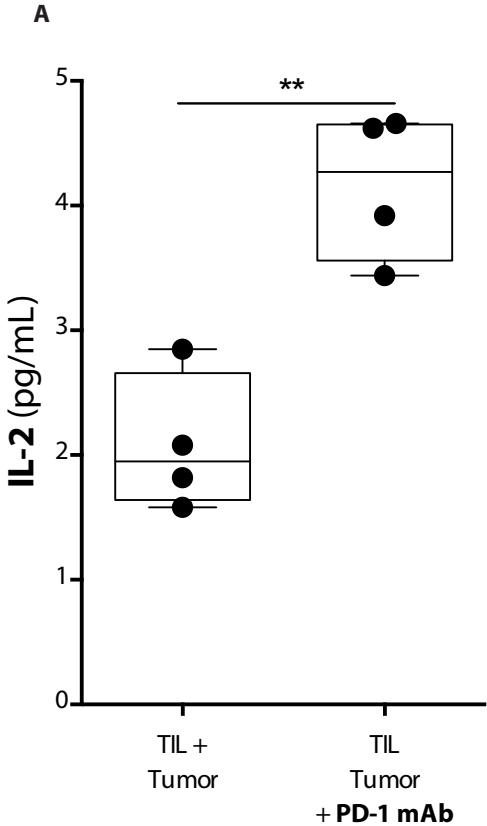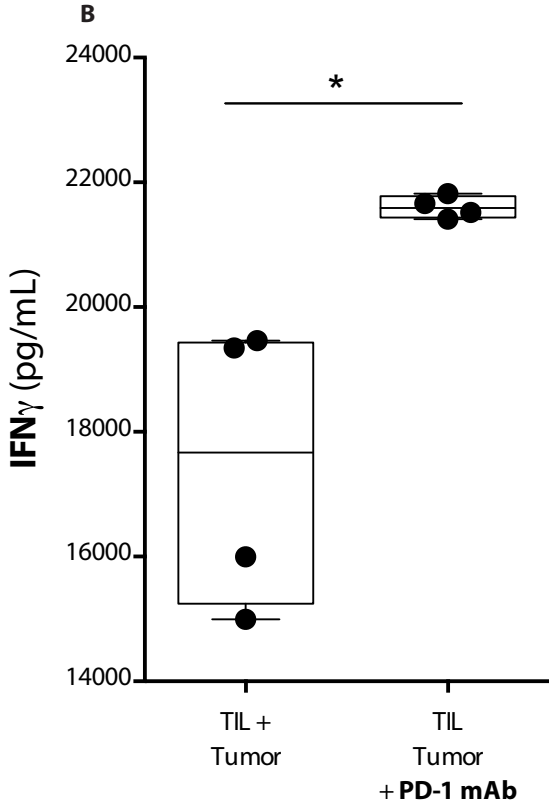

Patient 1

Patient 2

Patient 3

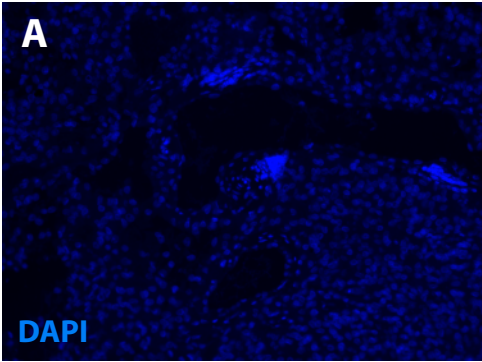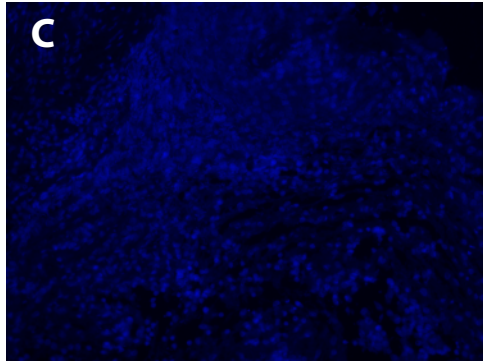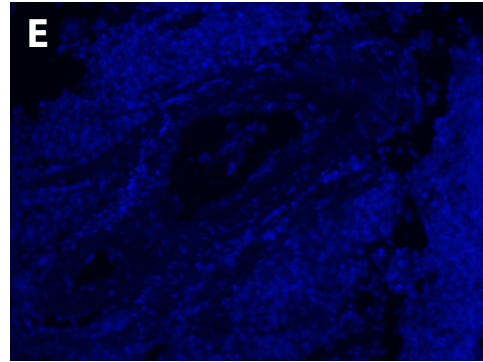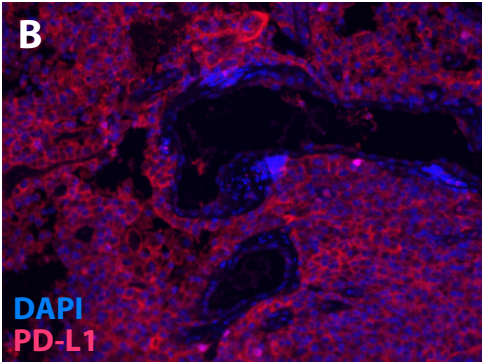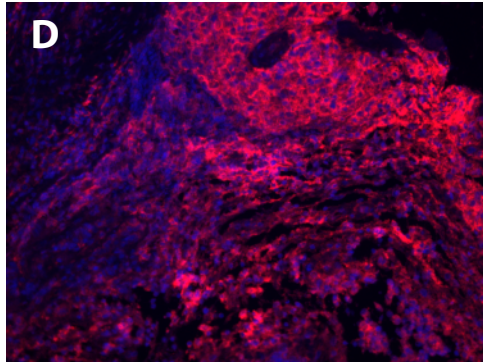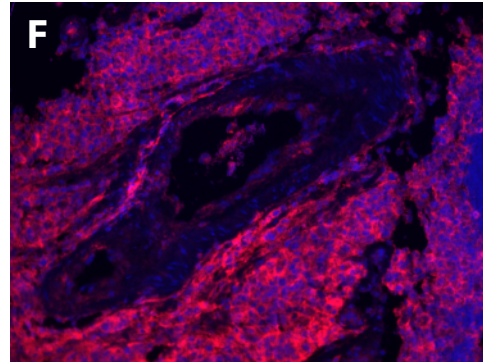

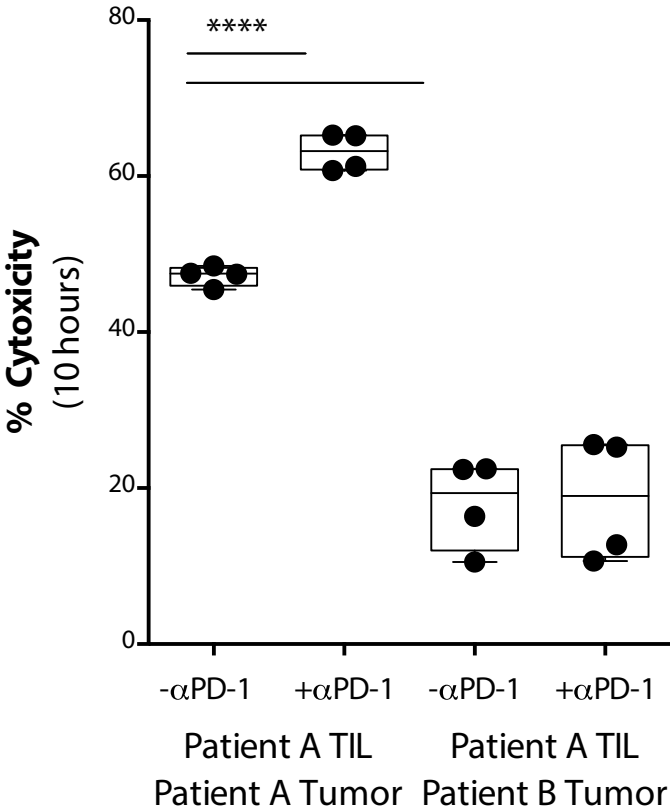

Supplement: jciinsight-1-87059-s001.pdf [file jciinsight-1-87059-s001.pdf]
